# Supplementary material for: A Deeper Insight into the Interfacial Behavior and Structural Properties of Mixed DPPC/POPC Monolayers: Implications for Respiratory Health
Source: MDPI journal article supplement (doi:10.3390/membranes13010033), 2022-12-28
Supplement: s1 [file s1]

## **A Deeper Insight into the Interfacial Behavior and Structural Properties of Mixed DPPC/POPC Monolayers: Implications for Respiratory Health**

**Figure S1** The structural formula of DPPC and POPC.

**Figure S2** The hysteresis curves of DPPC and POPC monolayers

**Figure S3** Fitting curves of  $(\pi A/kT)$  vs.  $\pi$  for the mixtures of DPPC/POPC.

**Figure S4** BAM images of the investigated DPPC monolayers at different surface pressures.

**Figure S5** Raman spectra of the mixed DPPC/POPC monolayers at the air-water interface.

**Table S1** Particle size and dispersion index (PDI) of the mixed DPPC/POPC liposomes

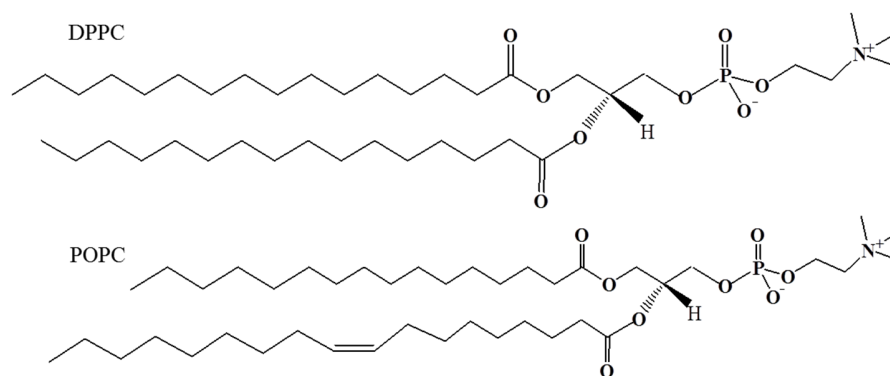

**Figure S1.** The structural formula of DPPC and POPC.

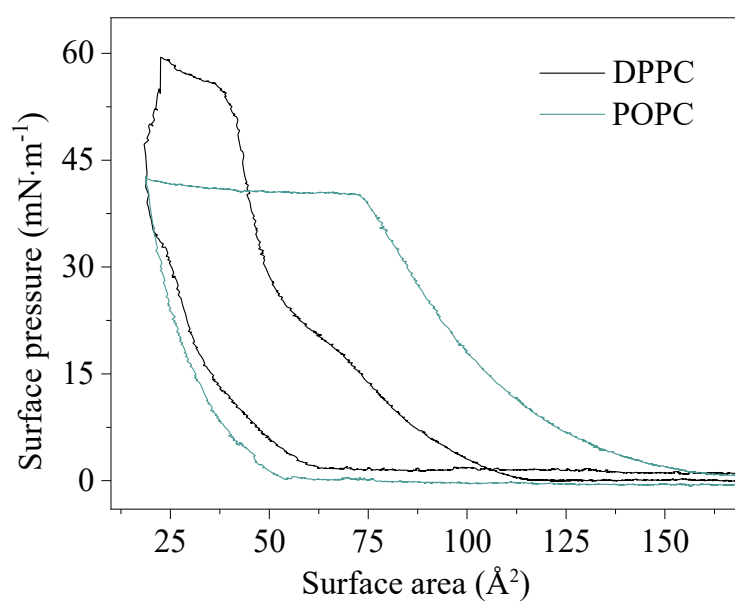

**Figure S2.** The hysteresis curves of DPPC and POPC monolayers.

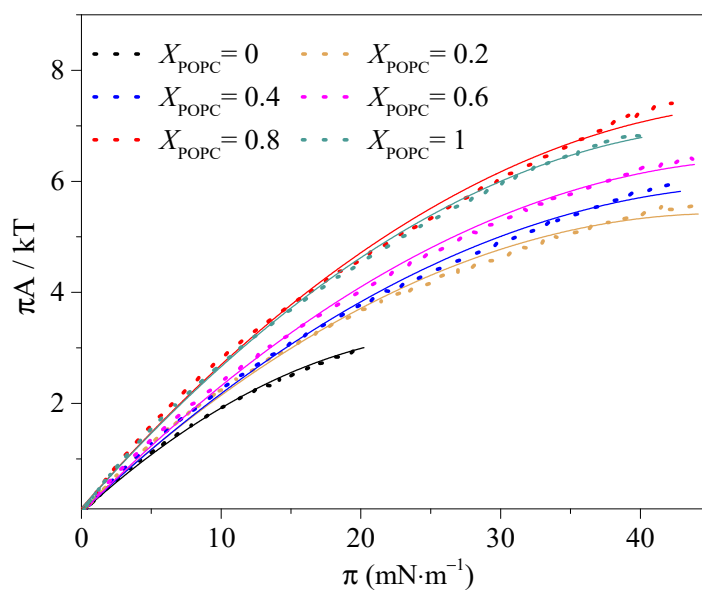

**Figure S3.** Fitting curves of  $(\pi A/kT)$  vs.  $\pi$  for the mixtures of DPPC/POPC. The dot lines represent the experimental data, and the solid lines represent the regression results of eq (4).

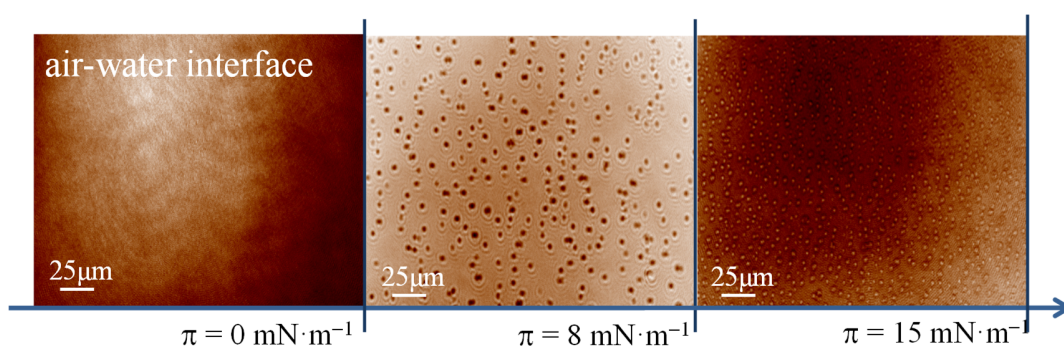

**Figure S4.** BAM images of the investigated DPPC monolayers at different surface pressures.

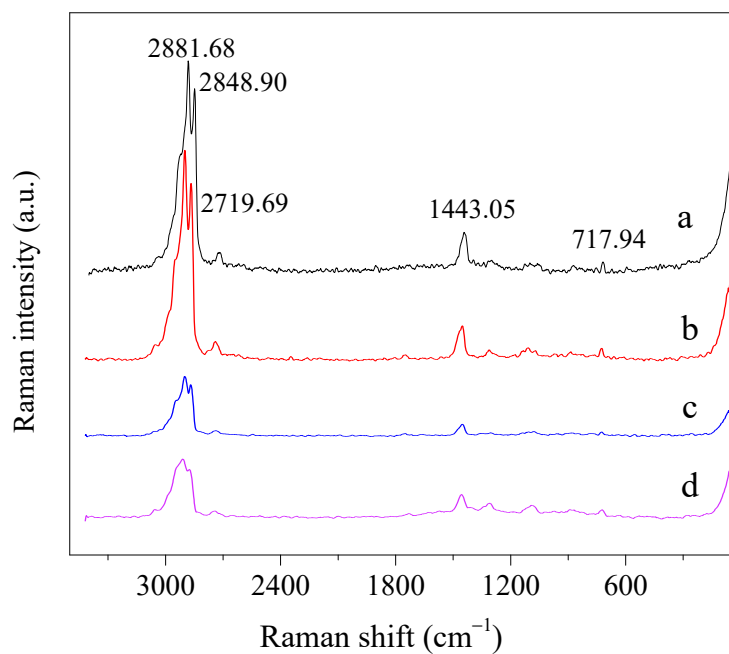

**Figure S5.** Raman spectra of the mixed DPPC/POPC monolayers at the air-water interface.

a: DPPC, b: DPPC/POPC ( $X_{\text{POPC}}=0.4$ ), c: DPPC/POPC ( $X_{\text{POPC}}=0.6$ ), d: POPC.

**Table S1** Particle size and dispersion index (PDI) of the mixed DPPC/POPC liposomes

| $X_{\text{POPC}}$ | Average particle size (nm) | PDI   |
|-------------------|----------------------------|-------|
| 0.0               | 1458                       | 0.445 |
| 0.5               | 1085                       | 0.313 |
| 1.0               | 874                        | 0.156 |
